# Supplementary material for: A boron-centered radical: a potassium-crown ether stabilized boryl radical anion
Source: Royal Society of Chemistry journal article supplement (doi:10.1039/c6cc06918e), 2016-01-01
Supplement: c6cc06918e1.pdf [file c6cc06918e1.pdf]

## Electronic Supplementary Information (ESI) for Chemical Communication

### A Boron-Centered Radical: Potassium-Crown-Ether Stabilized Boryl Radical Anion

Ningning Yuan,<sup>a</sup> Wenqing Wang,<sup>a</sup> Ziyu Wu,<sup>b</sup> Sheng Chen,<sup>a</sup> Gengwen  
Tan,<sup>a</sup> Yunxia Sui,<sup>a</sup> Xinping Wang,<sup>\* a</sup> Jun Jiang,<sup>\* b</sup> and Philip P. Power<sup>\* c</sup>

#### Caption of Content

1. Experimental section, page S2-S3;
2. Computational details, page S3;
3. Cyclic voltammogram of **1**, Fig. S1, page S4;
4. Experimental and calculated structural parameters for **1**, **1K** and free **1<sup>-</sup>**, Table S1, page S5;
5. Mulliken atomic spin densities for some atoms in free **1<sup>-</sup>**, page S6;
6. Mulliken atomic spin densities for some atoms in **1K**, pages S7-S8;
7. Calculated absorption spectrum of **1<sup>-</sup>** and related molecular orbitals, Fig. S2, page S9;
8. Coordinates for optimized geometries of **1**, **1<sup>-</sup>** and **1K**, pages S10-S16.

## Experimental Section

All experiments were carried out under a nitrogen or argon atmosphere by using standard Schlenk techniques and a glovebox. Solvents were dried prior to use. Mes<sub>2</sub>BF, 4-Bromo-3,5-dimethylpyridine hydrochloride, *n*-BuLi and 18-Crown-6 were purchased and used upon arrival. Cyclic voltammetry was performed on a CHI660E electrochemical workstation with platinum as the working and a saturated calomel electrode as reference. Freshly distilled THF was used as a solvent and n-Bu<sub>4</sub>NPF<sub>6</sub> (10<sup>-1</sup>M) was used as electrolyte. EPR spectra were obtained using Bruker EMX plus-6/1 X-band variable-temperature apparatus and was simulated with the software of WINEPR SimFonia. UV-Vis spectra were recorded on Lambda 750 spectrometer. Element analyses were performed at Shanghai Institute of Organic Chemistry, the Chinese Academy of Sciences. X-ray crystal structures were obtained by using Bruker D8 CMOS detectors. <sup>1</sup>H-, <sup>13</sup>C and <sup>11</sup>B NMR spectra were recorded on a Bruker DPX 400. Infrared spectra were collected on a VECTOR22 FT-IR spectrometer. Mass spectrometry (MS) was performed on Shimadzu LC-MS 2010.

**Synthesis of 1:** To a suspension of 4-Bromo-3,5-dimethylpyridine hydrochloride (3.05 g, 13.7 mmol) in dry ether (80 mL) was added *n*-BuLi in *n*-hexane (2.5 M, 14 mL, 35 mmol) at -78°C under argon. After 1 hour, Dimesitylfluoroborane (4.34 g, 16.2 mmol) in dry ether was added. The mixture was allowed to warm to room temperature and stirred for 24h. The pale yellow solid obtained by evaporation of the solvent was subjected to chromatography on SiO<sub>2</sub> eluting with hexane/EtOAc (10:1) to **1** (1.20 g, 27%) as a Colorless solid; <sup>1</sup>H NMR (CDCl<sub>3</sub>, 400 MHz, ppm) δ 8.16 (s, 2H), 6.75 (s, 4H), 2.27(s, 6H), 2.01 (s, 6H), 1.97 (s, 6H), 1.94 (s, 6H). <sup>13</sup>C NMR(CDCl<sub>3</sub>, 100 MHz, ppm) δ 148.20, 140.84, 140.38, 140.14, 133.75, 133.60, 128.82, 22.85, 21.23, 19.35. IR(KBr): 3010, 2978, 2855, 1604, 1443, 1417, 1373, 1267, 1239, 1220, 1203, 1174, 1154, 1033, 869, 844, 750, 734, 702, 671, 520. <sup>11</sup>B NMR (CDCl<sub>3</sub>, 128 MHz, ppm) 73.25. MS: *m/z* 356.25 [M<sup>+</sup>]. Elemental analysis (%) Calcd: C 84.51; H 8.51; N 3.94; Found: C 84.32, H 8.61, N 3.82.

**Synthesis of 1K:** Under anaerobic and anhydrous conditions, a mixture of **1** (0.208 g, 0.636 mmol), 18-Crown-6 (0.176g, 0.667 mmol) and potassium (0.026 g, 0.667 mmol) in THF (≈ 30 mL) was stirred at room temperature for 1 day. The resultant

blue solution was filtered and the filtrate was then concentrated and stored at around -20 °C for 1 day to afford blue X-ray-quality crystals of **1K**. Yield: 0.138 g, 29.7 %. Elemental analysis (%) Calcd: C 67.38; H 8.55; N 1.92; Found: C 67.06, H 8.49, N 2.07.

### **Computational details**

All the geometry optimizations were carried out at the (U)B3LYP/6-31G(d, (p)) level of theory. The obtained stationary points were characterized by frequency calculations. The molecular orbitals and spin densities were calculated at the level of (U)B3LYP/6-31G(d, p) at the optimized geometries. Time-dependent density functional theory (TDDFT) calculations at the same level were performed to calculate the excited states. The solvent effect of THF was considered with the polarizable continuum model (PCM). The UV-vis absorption spectrum was calculated for **1k** using time-dependent DFT (TD-DFT) method at UB3LYP/6-31g(d, p). The EPR spectrum was calculated at the UB3LYP/6-311g(d) level using the optimized geometry. All calculations were performed with the Gaussian 09 program suite.

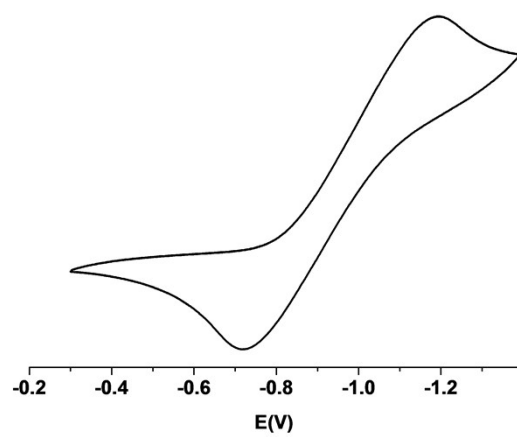

**Figure S1.** Cyclic voltammogram of **1** ( $1 \times 10^{-3}$  M) in THF, containing 0.1 M  $n\text{Bu}_4\text{NPF}_6$ , measured at  $100 \text{ mV s}^{-1}$  at  $25 \text{ }^\circ\text{C}$

**Table S1.** Experimental and Calculated Structural Parameters (avg.) for **1**, **1K** and free **1<sup>-</sup>**.

| Experimental                |          |           |                           |
|-----------------------------|----------|-----------|---------------------------|
|                             | <b>1</b> | <b>1K</b> |                           |
| B-C <sub>mes</sub> (Å)      | 1.572(3) | 1.603(3)  |                           |
| B-C <sub>pyridine</sub> (Å) | 1.594(3) | 1.553(3)  |                           |
| Calculated                  |          |           |                           |
|                             | <b>1</b> | <b>1K</b> | free <b>1<sup>-</sup></b> |
| B-C <sub>mes</sub> (Å)      | 1.582    | 1.603     | 1.597                     |
| B-C <sub>pyridine</sub> (Å) | 1.594    | 1.554     | 1.577                     |
| Electron spin density       |          | 0.53      | 0.64                      |

**Selected Mulliken atomic spin densities for some atoms in free 1<sup>-</sup>**

|    |   |           |
|----|---|-----------|
| 1  | N | 0.105979  |
| 2  | C | -0.062888 |
| 3  | C | 0.053328  |
| 4  | C | 0.057479  |
| 5  | B | 0.638825  |
| 6  | C | -0.021964 |
| 7  | C | 0.073643  |
| 8  | C | 0.073732  |
| 9  | C | 0.053036  |
| 10 | C | -0.027978 |
| 11 | C | -0.062673 |
| 12 | C | -0.001817 |
| 13 | C | -0.027981 |
| 14 | C | -0.001744 |
| 15 | C | 0.057146  |
| 16 | C | -0.028378 |
| 17 | C | -0.028430 |
| 21 | C | 0.070744  |
| 22 | C | -0.030198 |
| 23 | C | -0.005984 |
| 24 | C | -0.030491 |
| 25 | C | -0.001067 |
| 26 | H | 0.001373  |
| 27 | C | -0.004083 |
| 28 | C | -0.000965 |
| 33 | C | 0.071104  |
| 36 | C | -0.004059 |
| 37 | C | -0.006011 |

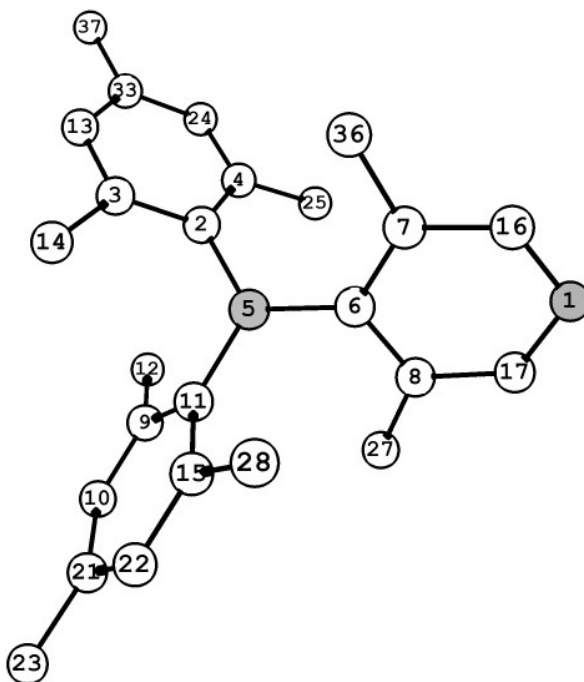

Sum of Mulliken atomic spin densities = 1.00000

## Selected Mulliken atomic spin densities for some atoms in 1K

|    |   |           |
|----|---|-----------|
| 1  | K | 0.000146  |
| 2  | O | -0.000009 |
| 3  | O | 0.000004  |
| 4  | O | 0.000002  |
| 5  | N | 0.178410  |
| 6  | O | -0.000014 |
| 7  | O | 0.000233  |
| 8  | O | 0.000001  |
| 9  | C | 0.000011  |
| 10 | C | -0.000005 |
| 11 | C | 0.000004  |
| 12 | C | 0.000000  |
| 13 | C | 0.000197  |
| 14 | C | 0.000413  |
| 15 | C | 0.000003  |
| 16 | C | 0.000004  |
| 17 | C | -0.000003 |
| 18 | C | -0.000002 |
| 19 | C | -0.000005 |
| 20 | C | 0.000038  |
| 21 | C | -0.058184 |
| 22 | C | 0.031771  |
| 23 | C | 0.034172  |
| 24 | B | 0.532946  |
| 25 | C | 0.083380  |
| 26 | C | 0.077140  |
| 27 | C | 0.071508  |
| 28 | C | 0.030829  |
| 29 | C | -0.014186 |
| 30 | C | -0.056105 |
| 31 | C | -0.001002 |
| 34 | C | -0.014638 |
| 35 | C | -0.000980 |
| 36 | C | 0.035366  |
| 37 | C | -0.008785 |
| 38 | C | -0.010094 |
| 44 | C | 0.035153  |
| 45 | C | -0.017038 |
| 46 | C | -0.002908 |
| 47 | C | -0.016701 |
| 48 | C | 0.001031  |

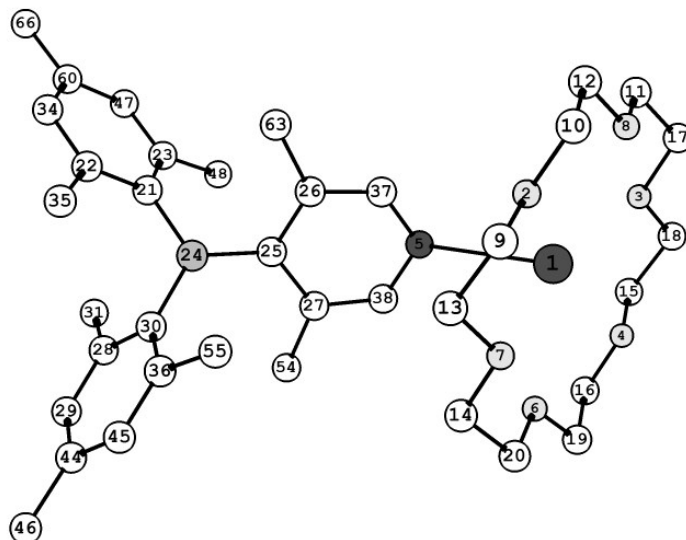

|    |   |           |
|----|---|-----------|
| 54 | C | -0.005692 |
| 55 | C | 0.000975  |
| 60 | C | 0.034444  |
| 63 | C | -0.006219 |
| 66 | C | -0.002837 |

Sum of Mulliken atomic spin densities = 1.0000



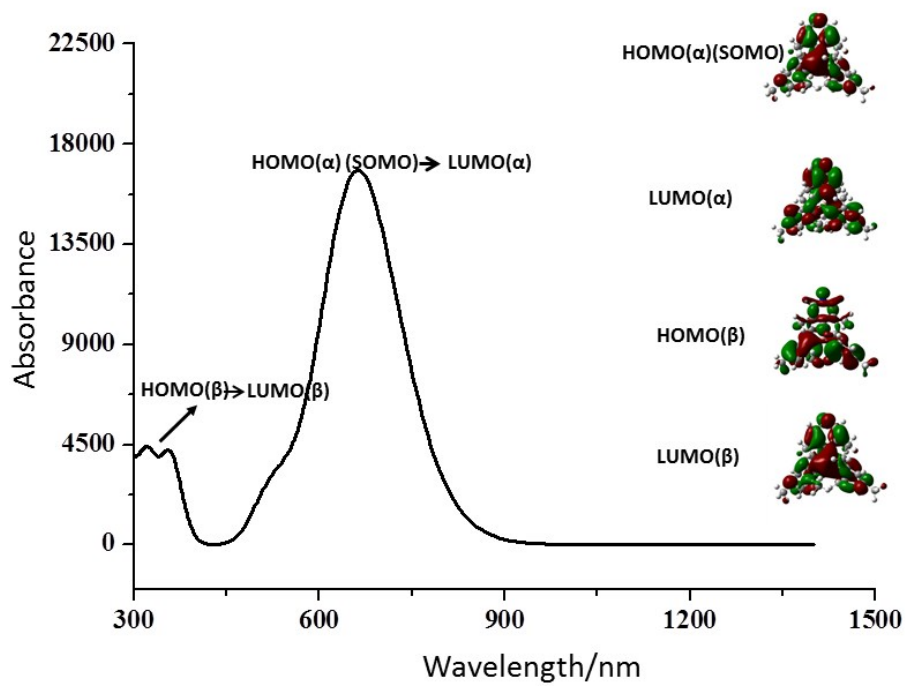

**Figure S2.** Calculated absorption spectrum of  $1^{*-}$  and related molecular orbitals.

## Coordinates for optimized geometries of 1, 1K and free 1<sup>-</sup>

### Neutral 1

|   |             |             |             |
|---|-------------|-------------|-------------|
| B | 0.00000300  | 0.22954800  | 0.00001500  |
| C | 1.37786900  | -0.54782900 | -0.01278600 |
| C | 1.63365900  | -1.59236900 | 0.91980700  |
| C | 2.86768400  | -2.25030400 | 0.91575800  |
| H | 3.04653400  | -3.03408500 | 1.64879100  |
| C | 3.61278800  | -0.92960400 | -0.92994200 |
| H | 4.37325000  | -0.67950300 | -1.66687500 |
| C | 2.40633600  | -0.22330700 | -0.94028200 |
| C | 2.24850600  | 0.86058400  | -1.98943100 |
| H | 2.29525100  | 1.86100200  | -1.54870800 |
| H | 1.29624100  | 0.79389100  | -2.52378400 |
| H | 3.04554400  | 0.78933500  | -2.73468100 |
| C | 0.62232500  | -2.02449900 | 1.96484200  |
| H | -0.24782200 | -2.50932900 | 1.51403400  |
| H | 0.24415200  | -1.18260900 | 2.55377100  |
| H | 1.07630100  | -2.73194000 | 2.66428800  |
| C | -0.00003200 | 1.82333300  | -0.00000300 |
| C | -0.75987100 | 2.56688800  | -0.93869700 |
| C | -1.62061200 | 1.93302400  | -2.00963700 |
| H | -1.06994900 | 1.20028100  | -2.60897200 |
| H | -1.99772000 | 2.69718900  | -2.69538300 |
| H | -2.48019300 | 1.40955800  | -1.58178000 |
| C | -0.70293500 | 3.96507200  | -0.89019500 |
| H | -1.26958600 | 4.54653100  | -1.61756700 |
| N | -0.00009600 | 4.66882600  | -0.00003000 |
| C | 3.87250200  | -1.94060400 | -0.00261000 |
| C | 5.20170300  | -2.65504300 | 0.02225400  |
| H | 5.93049800  | -2.11135300 | 0.63665400  |
| H | 5.62812100  | -2.74358500 | -0.98155900 |
| H | 5.10833500  | -3.66049900 | 0.44318600  |
| C | -1.37784300 | -0.54787200 | 0.01281800  |
| C | -1.63359600 | -1.59239400 | -0.91980000 |
| C | -2.86761000 | -2.25035000 | -0.91578900 |
| H | -3.04643800 | -3.03410900 | -1.64885100 |
| C | -3.61276300 | -0.92971600 | 0.92994100  |
| H | -4.37324100 | -0.67964700 | 1.66686900  |
| C | -2.40632500 | -0.22339700 | 0.94031400  |
| C | -2.24851000 | 0.86046800  | 1.98949300  |
| H | -2.29526500 | 1.86089900  | 1.54879800  |
| H | -1.29624400 | 0.79376100  | 2.52384100  |
| H | -3.04554600 | 0.78919300  | 2.73474300  |

|   |             |             |             |
|---|-------------|-------------|-------------|
| C | -0.62220600 | -2.02454600 | -1.96477400 |
| H | 0.24753800  | -2.51009500 | -1.51394000 |
| H | -0.24337400 | -1.18259600 | -2.55317600 |
| H | -1.07636600 | -2.73141000 | -2.66468500 |
| C | 0.75976900  | 2.56694100  | 0.93868000  |
| C | 1.62053200  | 1.93313400  | 2.00963700  |
| H | 1.06992200  | 1.20032400  | 2.60893600  |
| H | 1.99754600  | 2.69731800  | 2.69541200  |
| H | 2.48017700  | 1.40976100  | 1.58179100  |
| C | 0.70277200  | 3.96512000  | 0.89015200  |
| H | 1.26938800  | 4.54662000  | 1.61751800  |
| C | -3.87244500 | -1.94069400 | 0.00257500  |
| C | -5.20163700 | -2.65514900 | -0.02232800 |
| H | -5.93046800 | -2.11138400 | -0.63661900 |
| H | -5.62801000 | -2.74383500 | 0.98149100  |
| H | -5.10827100 | -3.66054500 | -0.44340200 |

## 1K

|   |             |             |             |
|---|-------------|-------------|-------------|
| K | -3.77426100 | 0.03180600  | 0.11785600  |
| O | -3.05782300 | -0.88742000 | 2.67867000  |
| O | -5.67781700 | -1.51173200 | -1.36627300 |
| O | -5.38607700 | 1.26246400  | -1.99033900 |
| N | -1.24141700 | -0.44629200 | -0.76042500 |
| O | -3.46648900 | 2.76787300  | -0.54450600 |
| O | -2.63670700 | 1.86539900  | 2.03703200  |
| O | -5.01075000 | -2.37240900 | 1.27083700  |
| C | -2.52865900 | 0.05855400  | 3.59996800  |
| C | -3.79401600 | -1.93315500 | 3.28728100  |
| C | -5.37635500 | -3.26904800 | 0.23109600  |
| C | -4.14085900 | -2.96176600 | 2.23143000  |
| C | -1.73825000 | 1.10099600  | 2.83857700  |
| C | -1.97901200 | 2.90805400  | 1.32152700  |
| C | -5.71015200 | 0.27526100  | -2.96006000 |

|   |             |             |             |
|---|-------------|-------------|-------------|
| C | -4.70253600 | 2.38160400  | -2.54416300 |
| C | -6.34472700 | -2.57678800 | -0.70410900 |
| C | -6.50553100 | -0.82892400 | -2.29709400 |
| C | -4.38680200 | 3.36776700  | -1.43913100 |
| C | -2.99756300 | 3.64202600  | 0.47594600  |
| C | 4.12424700  | -1.46475900 | -0.34630800 |
| C | 5.08948300  | -1.75511800 | 0.65972300  |
| C | 4.05038000  | -2.37844600 | -1.43676800 |
| B | 3.19848600  | -0.15771700 | -0.29451000 |
| C | 1.65597000  | -0.25596000 | -0.45252400 |
| C | 0.87344700  | -1.37206300 | 0.03698400  |
| C | 0.85621400  | 0.75553000  | -1.11155700 |
| C | 5.02843000  | 1.67500000  | -0.87508100 |
| C | 5.67106600  | 2.89334100  | -0.63294200 |
| C | 3.92711600  | 1.25324800  | -0.07492700 |
| C | 5.52539200  | 0.84760400  | -2.04270000 |
| H | -4.71272700 | -1.54290700 | 3.75347600  |
| H | -3.19680500 | -2.42461900 | 4.07135500  |
| C | 5.91330900  | -2.88195300 | 0.56549600  |
| C | 5.24142900  | -0.88569400 | 1.89132000  |
| C | 3.53072200  | 2.13683800  | 0.96871800  |
| C | -0.50240400 | -1.39468200 | -0.13724600 |
| C | -0.51685800 | 0.59792000  | -1.23204000 |
| H | 4.70616400  | 0.56422300  | -2.71269800 |
| H | 5.99264100  | -0.08512200 | -1.71393500 |
| H | 6.26084800  | 1.40679200  | -2.63040600 |
| H | -3.21892700 | -3.31576600 | 1.74645700  |
| H | -4.62970200 | -3.82317900 | 2.71296900  |
| C | 5.28185700  | 3.74816500  | 0.40159600  |
| C | 4.20271000  | 3.34664800  | 1.18863800  |

|   |             |             |             |
|---|-------------|-------------|-------------|
| C | 6.01788200  | 5.04002900  | 0.66865400  |
| C | 4.89759400  | -3.49215400 | -1.50287400 |
| C | 3.06610900  | -2.19086800 | -2.57416600 |
| H | -1.22459600 | 1.75232600  | 3.56258100  |
| H | -0.97901000 | 0.61437400  | 2.21104100  |
| H | 3.87560300  | 3.99084400  | 2.00435400  |
| H | -1.86106300 | -0.44213600 | 4.31771600  |
| H | -3.34271700 | 0.54015100  | 4.16395600  |
| C | 1.46167300  | 1.97158100  | -1.77623100 |
| C | 2.37424500  | 1.81138000  | 1.89282700  |
| H | 3.31883200  | -2.84308300 | -3.41700400 |
| H | 3.05051300  | -1.15697300 | -2.93155600 |
| H | 2.03900900  | -2.42149400 | -2.26939300 |
| H | 6.49887300  | 3.18688500  | -1.27749100 |
| C | 5.84287400  | -3.76573600 | -0.51376000 |
| H | 6.62833200  | -3.07864300 | 1.36356800  |
| H | 4.81750200  | -4.16291400 | -2.35758100 |
| C | 1.47733500  | -2.51903700 | 0.81571500  |
| H | -4.79499400 | -0.13971000 | -3.40926500 |
| H | -6.31926100 | 0.71284700  | -3.76662000 |
| C | 6.77206000  | -4.95224300 | -0.61813300 |
| H | 0.68886200  | -3.13847400 | 1.25981500  |
| H | 2.12389100  | -2.15669900 | 1.62267700  |
| H | 2.10393400  | -3.16757900 | 0.19680400  |
| H | -5.86556600 | -4.16373900 | 0.64750400  |
| H | -4.48617100 | -3.59574800 | -0.32786000 |
| H | 5.41207600  | 5.73076500  | 1.26407700  |
| H | 6.28961600  | 5.54860800  | -0.26311900 |
| H | 6.95113100  | 4.86772600  | 1.22121400  |
| H | -1.18987100 | 2.49369600  | 0.67898700  |

|   |             |             |             |
|---|-------------|-------------|-------------|
| H | -1.51949400 | 3.62148800  | 2.02335700  |
| H | -6.71768500 | -3.31040900 | -1.43597600 |
| H | -7.20583900 | -2.19473600 | -0.13418100 |
| H | -7.38309300 | -0.40071600 | -1.78834800 |
| H | -6.86493200 | -1.52357800 | -3.07245700 |
| H | -1.09054800 | 1.36356000  | -1.75773600 |
| H | 5.89534800  | -1.36487900 | 2.62745500  |
| H | 4.27513900  | -0.69814800 | 2.37247700  |
| H | 5.66323100  | 0.09482900  | 1.65177600  |
| H | 2.36334900  | 2.48789400  | 2.75489800  |
| H | 2.42782500  | 0.78239600  | 2.26150000  |
| H | 1.40844000  | 1.90013300  | 1.38110900  |
| H | 7.72336900  | -4.68078600 | -1.09530100 |
| H | 6.33066600  | -5.75677300 | -1.21556400 |
| H | 7.01494600  | -5.36002000 | 0.36907600  |
| H | -1.06707100 | -2.23843300 | 0.26607400  |
| H | -3.83672500 | 3.98358200  | 1.10187900  |
| H | -2.51896700 | 4.52667700  | 0.02876700  |
| H | -3.95557700 | 4.27556800  | -1.88965400 |
| H | -5.31145700 | 3.65463600  | -0.91362300 |
| H | 0.70783500  | 2.49961500  | -2.37223500 |
| H | 2.28311000  | 1.68687900  | -2.44302200 |
| H | 1.88797500  | 2.68118700  | -1.06142700 |
| H | -5.33057700 | 2.87665900  | -3.30136600 |
| H | -3.76882800 | 2.05894500  | -3.02830100 |

free 1<sup>-</sup>

|   |            |             |             |
|---|------------|-------------|-------------|
| N | 0.02092500 | 4.76146200  | -0.00682800 |
| C | 1.37302400 | -0.53455500 | -0.01514000 |

|   |             |             |             |
|---|-------------|-------------|-------------|
| C | 1.59502000  | -1.64163600 | -0.89254900 |
| C | 2.44836200  | -0.21824000 | 0.87144000  |
| B | 0.00059100  | 0.28101800  | -0.00001700 |
| C | 0.00832500  | 1.85845400  | -0.00205800 |
| C | 0.91437900  | 2.63740700  | -0.79769100 |
| C | -0.89066600 | 2.64788400  | 0.79137300  |
| C | -1.61416200 | -1.61806000 | 0.90484300  |
| C | -2.82305900 | -2.32116900 | 0.88727400  |
| C | -1.37968300 | -0.52109200 | 0.01793000  |
| C | -0.58427000 | -2.04088400 | 1.93237100  |
| C | 2.79691300  | -2.35660400 | -0.87067300 |
| C | 0.55624400  | -2.06915200 | -1.90919200 |
| C | -2.45226600 | -0.19822800 | -0.86919700 |
| C | 0.86096800  | 4.03067600  | -0.75590800 |
| C | -0.82523800 | 4.04048300  | 0.74485500  |
| H | -0.19844000 | -1.17783900 | 2.48583800  |
| H | 0.28593200  | -2.52058700 | 1.47351500  |
| H | -1.01898500 | -2.74439300 | 2.65198300  |
| C | -3.86151400 | -1.99814600 | 0.00931800  |
| C | -3.64867700 | -0.92548300 | -0.85827600 |
| C | -5.14431100 | -2.79578700 | -0.01987000 |
| C | 3.63742600  | -0.95739700 | 0.86485200  |
| C | 2.33974800  | 0.90237800  | 1.88482000  |
| H | -4.43606400 | -0.65021000 | -1.56041600 |
| C | -1.88935800 | 2.03438400  | 1.74645000  |
| C | -2.33618700 | 0.92139000  | -1.88294200 |
| H | 3.14377400  | 0.83443400  | 2.62690900  |
| H | 1.37879900  | 0.87294500  | 2.40927400  |
| H | 2.39650400  | 1.89142000  | 1.41754100  |
| H | -2.96475500 | -3.14057200 | 1.59255000  |

|   |             |             |             |
|---|-------------|-------------|-------------|
| C | 3.84153700  | -2.03399900 | 0.00003800  |
| H | 2.92640900  | -3.18730400 | -1.56496900 |
| H | 4.42526400  | -0.69033800 | 1.56971400  |
| C | 1.90857000  | 2.01206600  | -1.74976200 |
| C | 5.14464800  | -2.79831000 | -0.01572900 |
| H | 2.33561600  | 2.77254800  | -2.41437400 |
| H | 1.43327400  | 1.24142600  | -2.36718500 |
| H | 2.73547900  | 1.51576300  | -1.23133100 |
| H | -5.97644100 | -2.20261700 | -0.41529000 |
| H | -5.42667700 | -3.14165900 | 0.98155100  |
| H | -5.05962800 | -3.69118800 | -0.65263500 |
| H | -1.50480500 | 4.61960600  | 1.37523800  |
| H | 0.98402400  | -2.77843000 | -2.62730700 |
| H | 0.16847900  | -1.20880700 | -2.46523200 |
| H | -0.31171100 | -2.54377000 | -1.44078500 |
| H | -3.14158000 | 0.85946600  | -2.62405900 |
| H | -1.37618300 | 0.88361600  | -2.40858200 |
| H | -2.38414900 | 1.91121300  | -1.41632000 |
| H | 4.98585300  | -3.86378600 | -0.21998400 |
| H | 5.66770600  | -2.71643500 | 0.94372100  |
| H | 5.83262000  | -2.42590200 | -0.78855300 |
| H | 1.54569300  | 4.60174800  | -1.38806800 |
| H | -2.30904200 | 2.80075700  | 2.40896500  |
| H | -1.41988300 | 1.26188100  | 2.36597100  |
| H | -2.72113900 | 1.54340800  | 1.23074800  |
